# Supplementary material for: Comprehensive Exploration of Bromophenol Derivatives: Promising Antibacterial Agents against SA and MRSA
Source: PubMed Central journal article supplement (PMC11447708; doi:10.1021/acsomega.4c06115), 2024-09-20
Supplement: ao4c06115_si_001.pdf [file ao4c06115_si_001.pdf]

# Comprehensive Exploration of Bromophenol Derivatives: Promising Antibacterial Agents against SA and MRSA

Ta Ngoc Ly<sup>1,\*</sup>, Le My Lan<sup>1</sup>, Ming-Yu Tsai<sup>2</sup>, Yun-Wen Chen<sup>3</sup>, Hsin-Yi Hung<sup>2\*</sup>.

<sup>1</sup>The University of Da Nang - University of Science and Technology, Danang 550000, Vietnam

<sup>2</sup>School of Pharmacy and Institute of Clinical Pharmacy and Pharmaceutical Sciences, College of Medicine, National Cheng Kung University, Tainan 701, Taiwan

<sup>3</sup>Departments of Pharmacology, College of Medicine, National Cheng Kung University, Tainan 701, Taiwan

\*Corresponding author: T.N. L. email: [tnly@dut.udn.vn](mailto:tnly@dut.udn.vn); H-Y. H. email: [z10308005@email.ncku.edu.tw](mailto:z10308005@email.ncku.edu.tw)

## Content

- S1. <sup>1</sup>H NMR (400 MHz, DMSO-*d*<sub>6</sub>) spectrum of 3,5-dibromo-2,6-dihydroxyacetophenone (1)
- S2. <sup>1</sup>H NMR (400 MHz, DMSO-*d*<sub>6</sub>) spectrum of 3-bromo-2,6-dihydroxyacetophenone (2)
- S3. <sup>1</sup>H NMR (400 MHz, DMSO-*d*<sub>6</sub>) spectrum of 3,5-dibromo-2,4-dihydroxyacetophenone (3)
- S4. Determination of the diameter of zone inhibition
- S5. Determine the MIC value of antibiotics on PA
- S6. Determine the MIC value of antibiotics on SA

$^1\text{H}$  NMR ( 400 MHz,  $\text{DMSO}-d_6$ ) spectrum of 3,5-dibromo-2,6-dihydroxyacetophenone (1)

SYH-N3-197-1  $^1\text{H}$  DMSO- $d_6$  400MHz 20231022

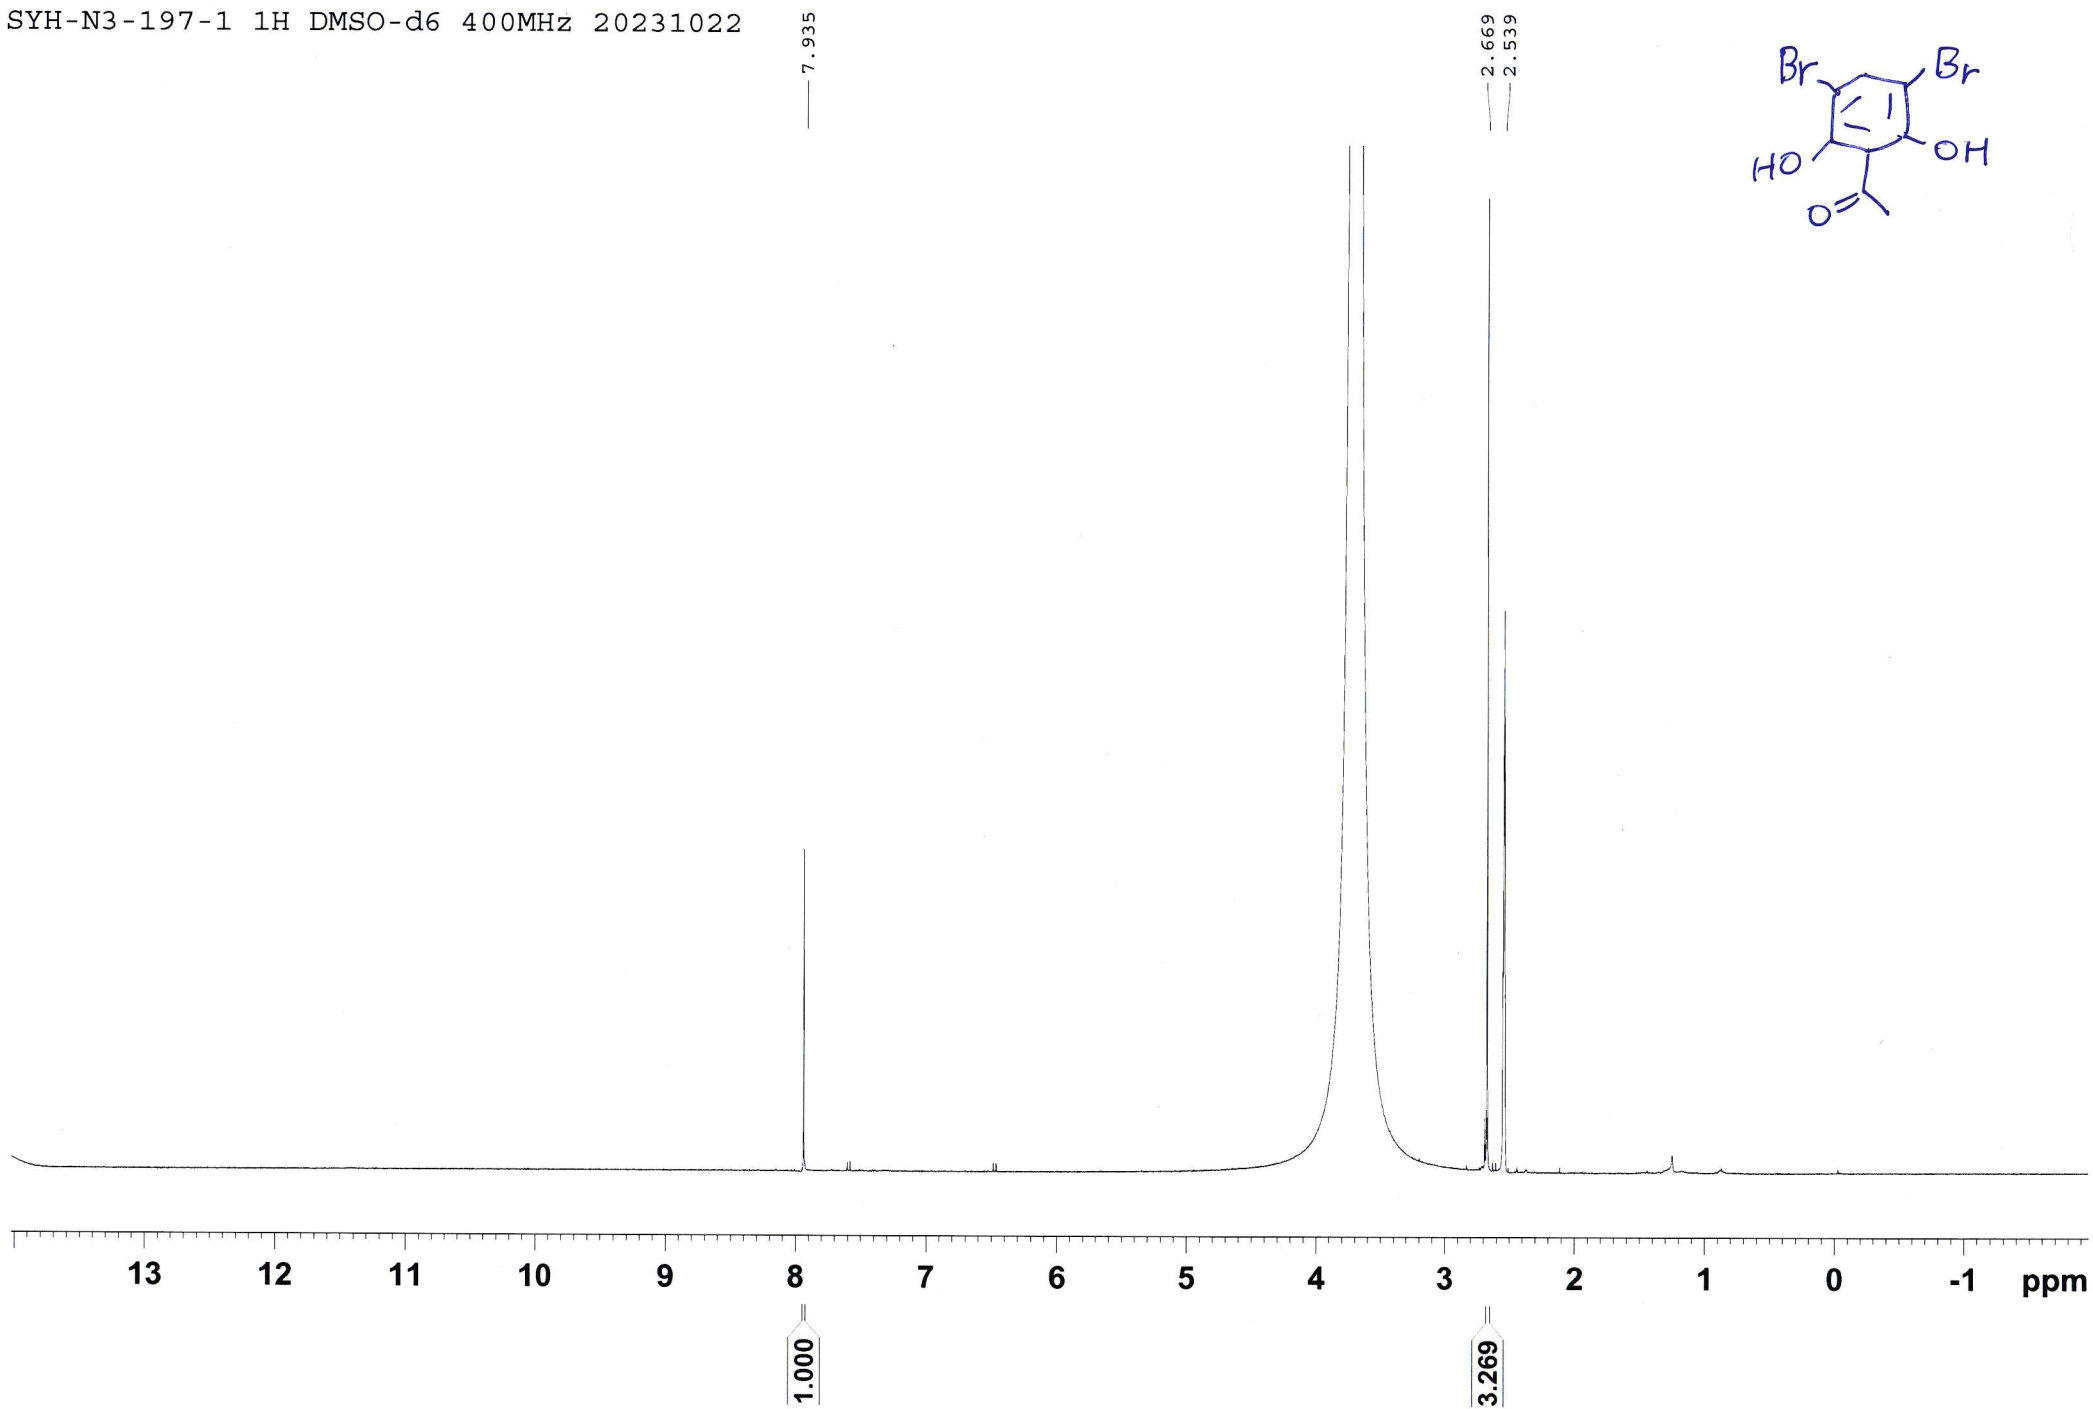

1H NMR (400 MHz, DMSO-d6) spectrum of 3-bromo-2,6-dihydroxyacetophenone (2)

SYH-N3-197-3 1H DMSO-d6 400MHz 20231022

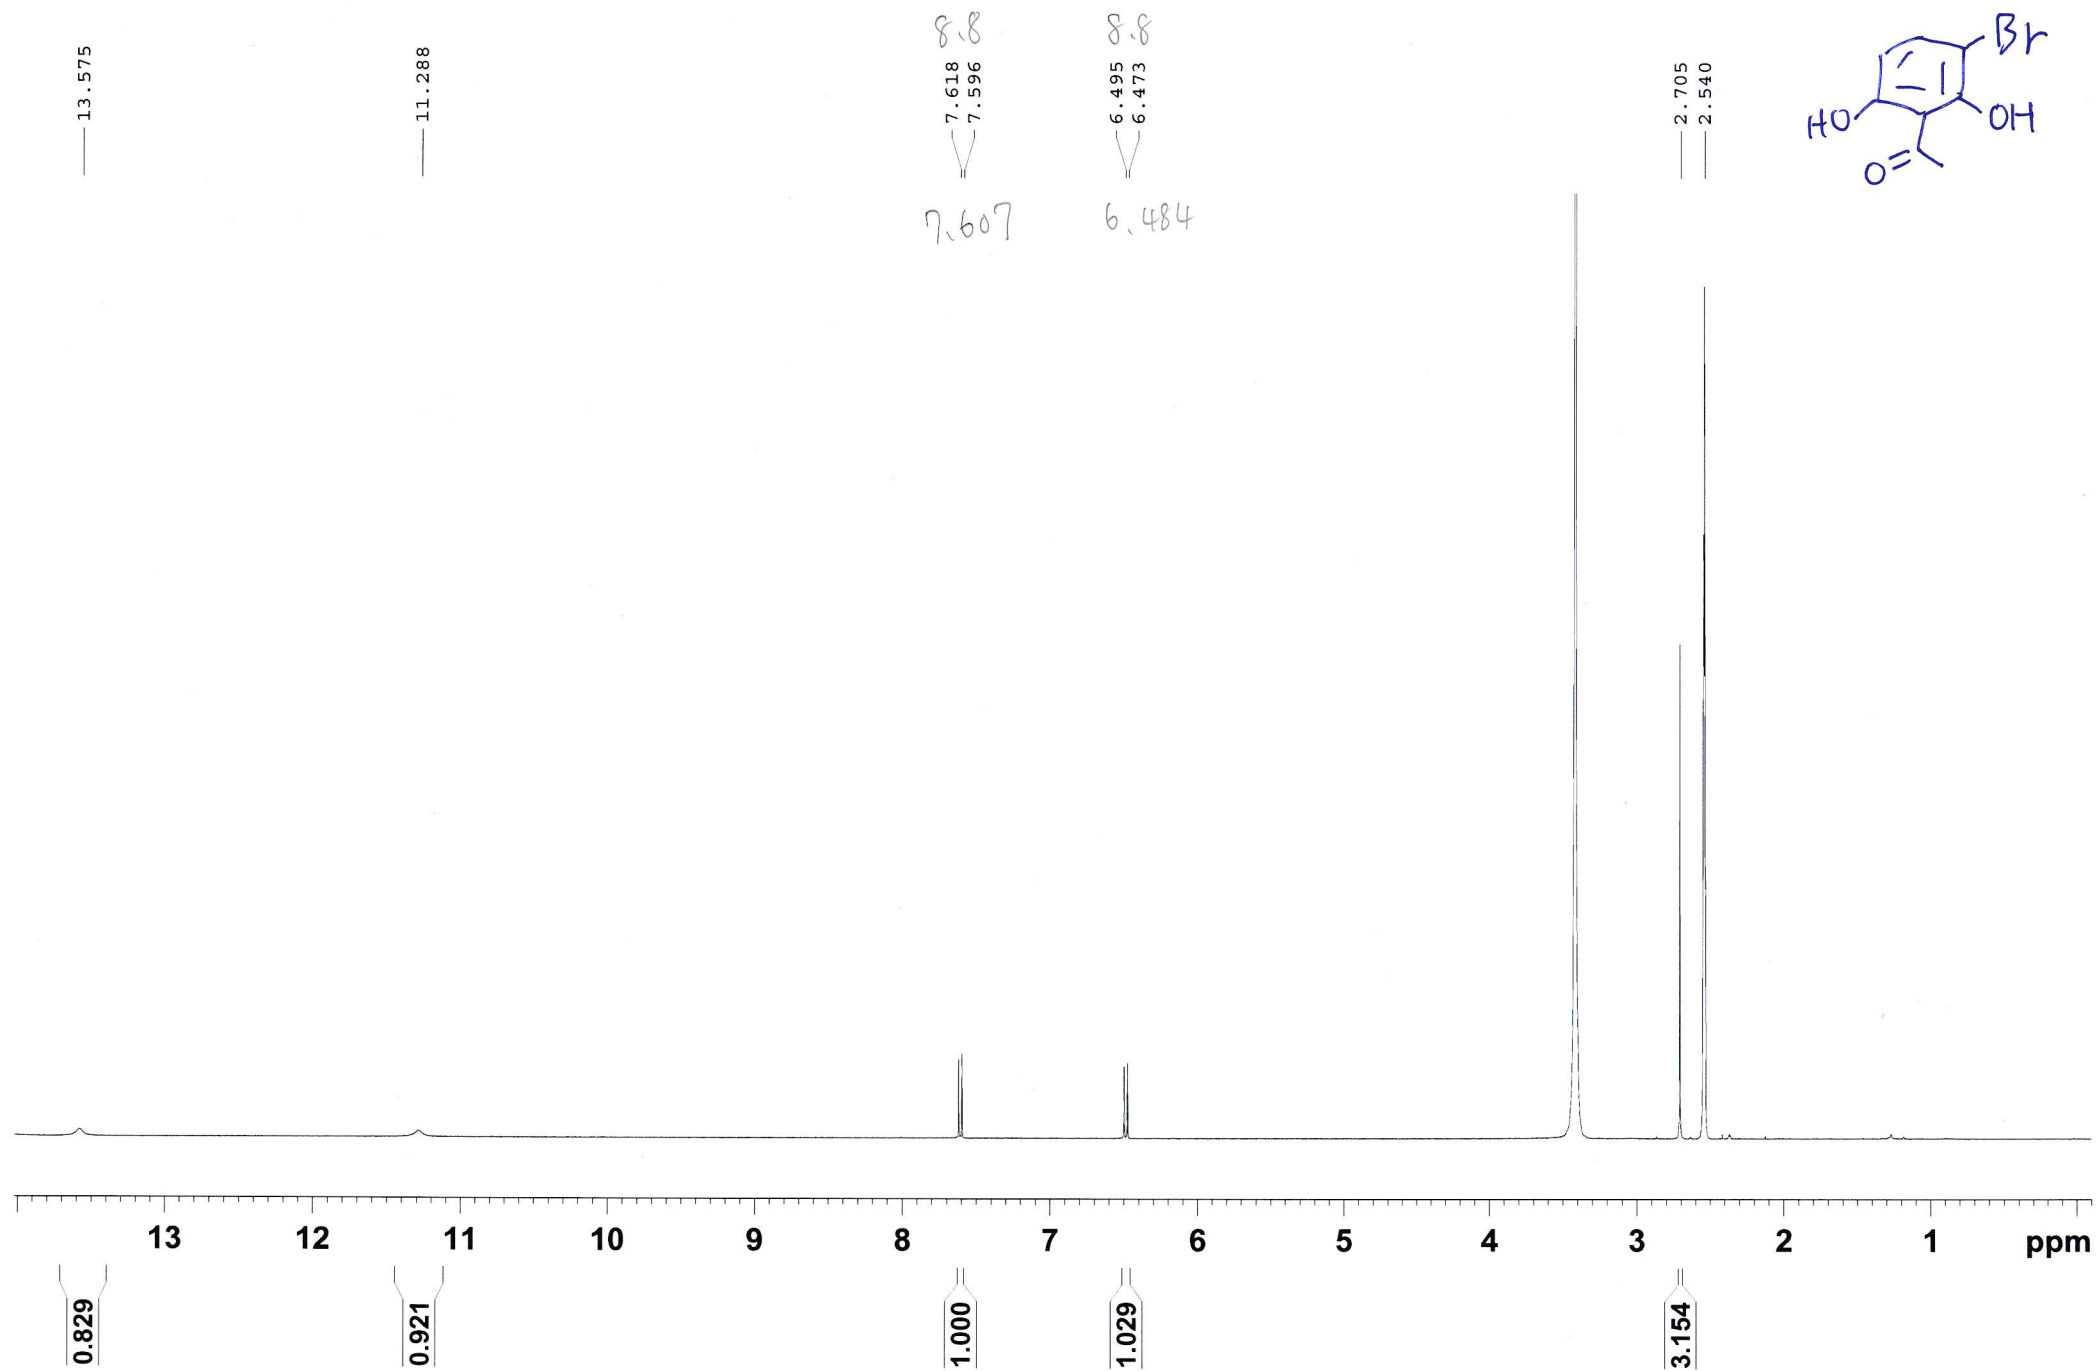

<sup>1</sup>H NMR (400 MHz, DMSO-d<sub>6</sub>) spectrum of 3,5-dibromo-2,4-dihydroxyacetophenone (3)

SYH-N3-199 1H DMSO-d<sub>6</sub> 400MHz 20231022

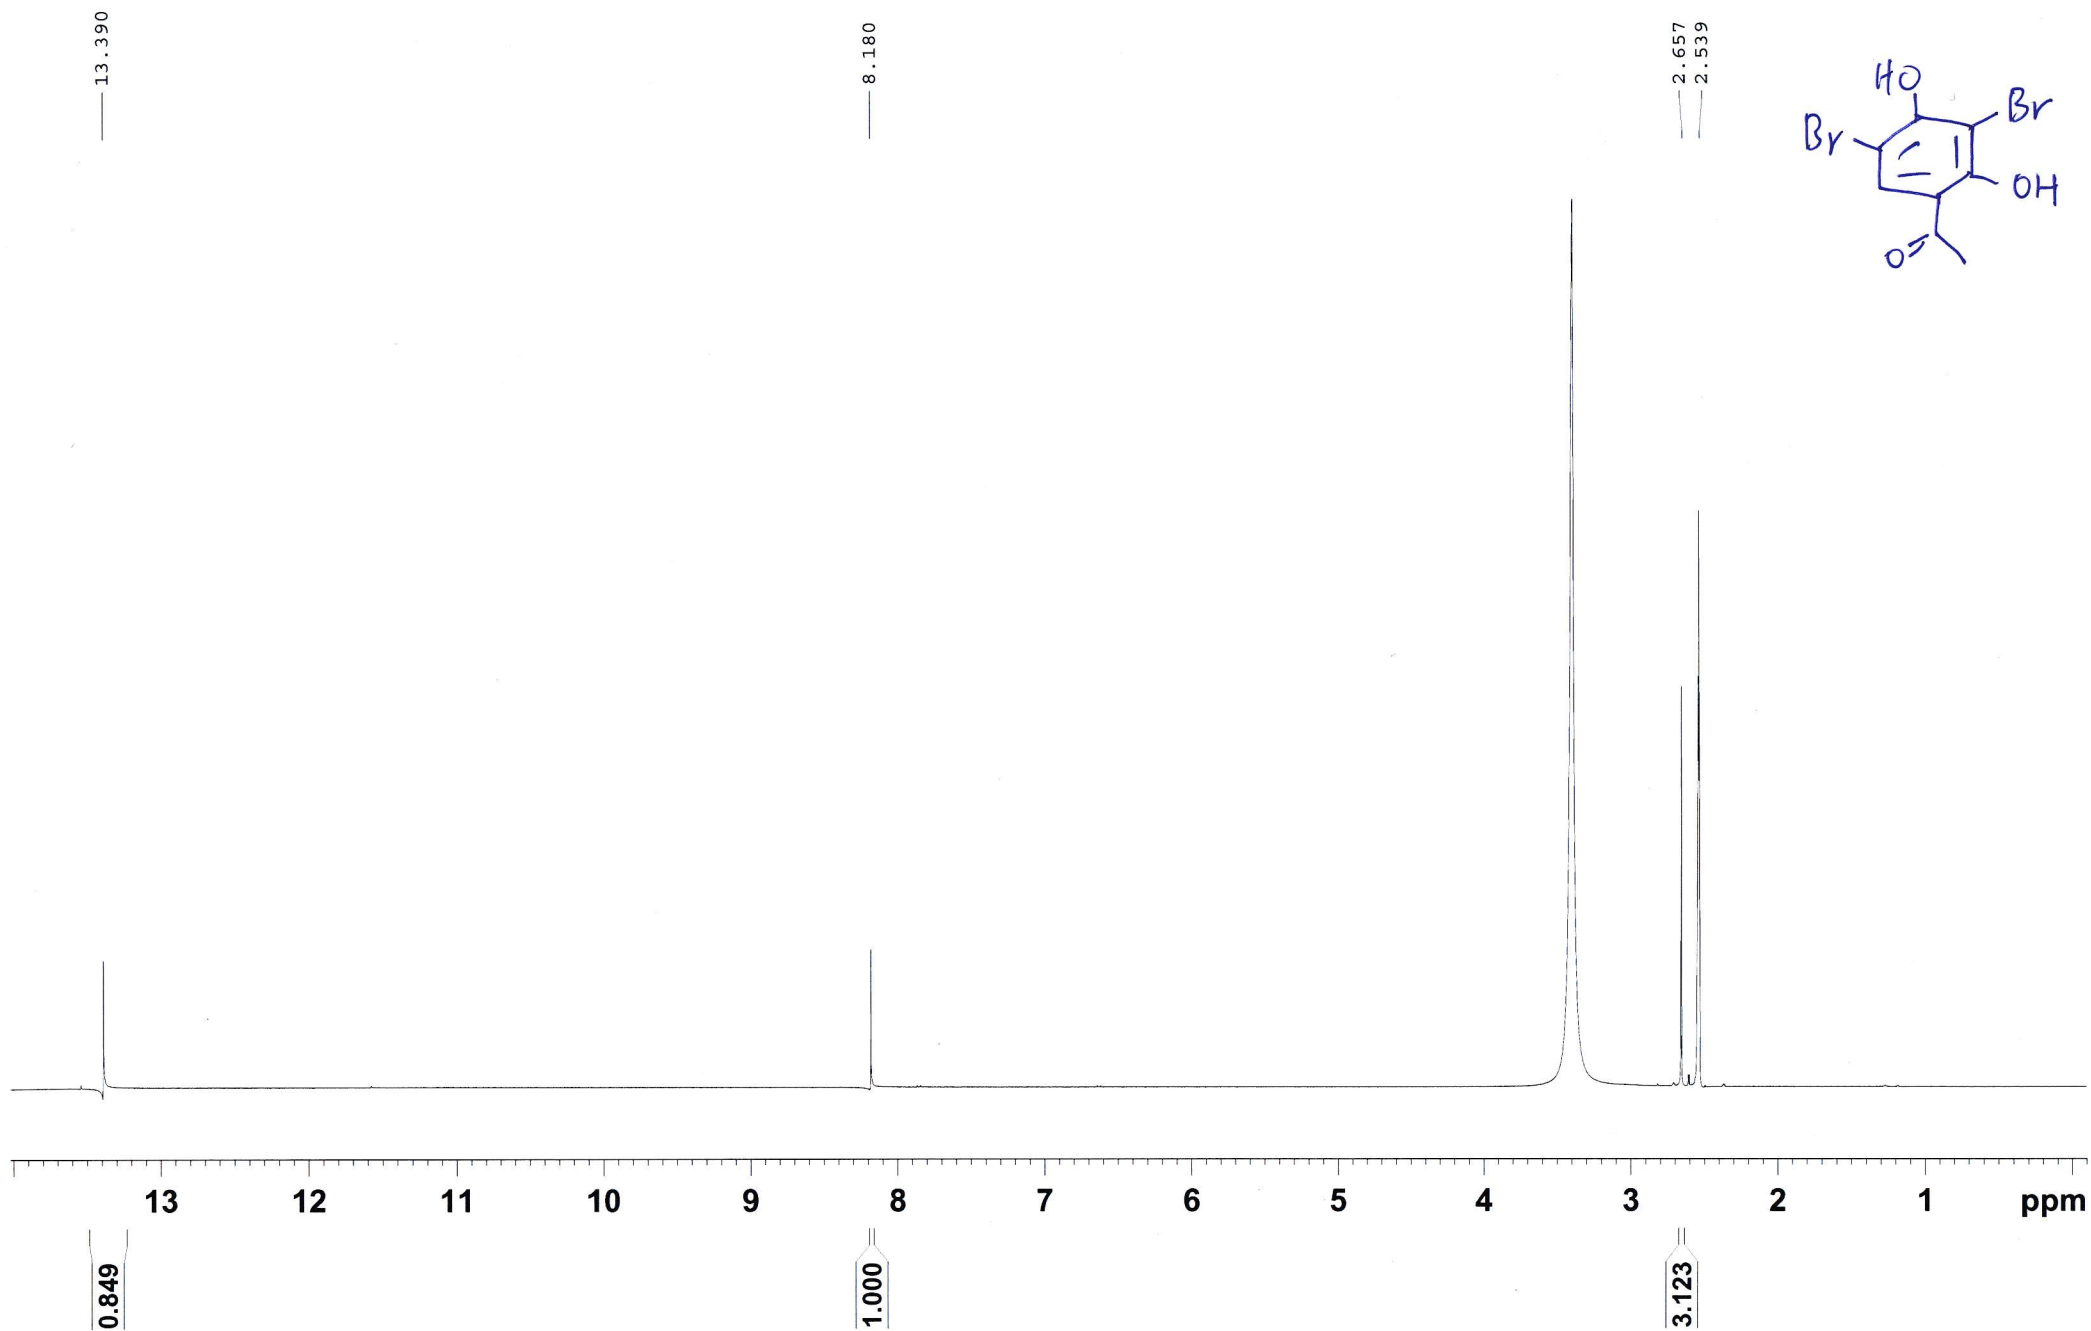

## S4. Determine the diameter of zone inhibition

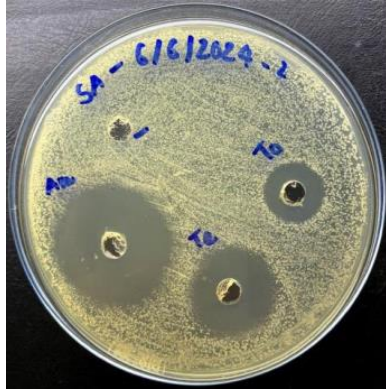

Diameter of zone inhibition on SA:

- Ampicillin:  $14.5 \pm 0.5$ mm
- Tetracycline:  $9.75 \pm 0.25$ mm
- Tobramycin:  $5.1 \pm 0.1$ mm

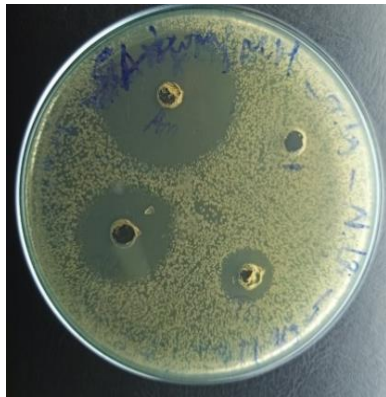

Diameter of zone inhibition on MRSA:

- Ampicillin:  $15.5 \pm 0.5$ mm
- Tetracycline:  $10.25 \pm 0.75$ mm
- Tobramycin:  $5.5 \pm 0.5$ mm

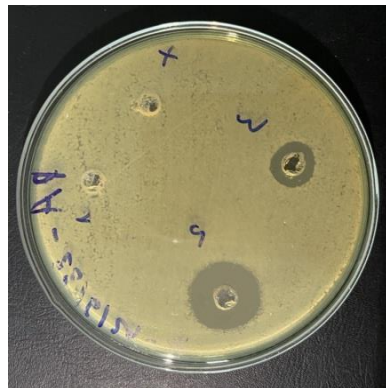

Diameter of zone inhibition on PA:

- Ampicillin: 0
- Tetracycline:  $10.5 \pm 0.5$ mm
- Tobramycin:  $5.5 \pm 0.5$ mm

S5. Determine the MIC value of antibiotics on PA

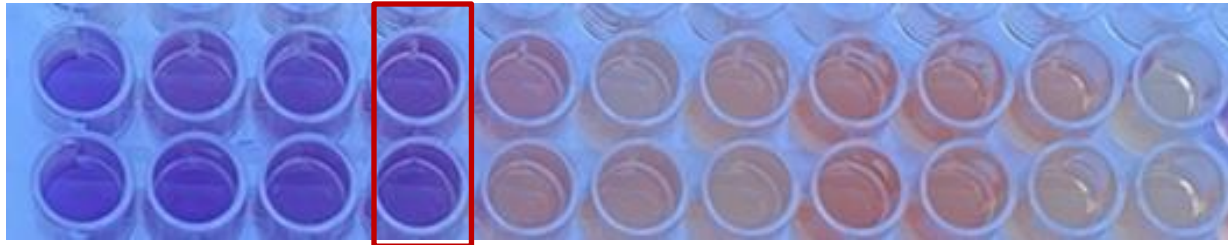

560 280 140 70 35 17.5 8.75 4.375 2.18 1.09 0.54

Tetracycline  
**MIC=70(µg/ml)**

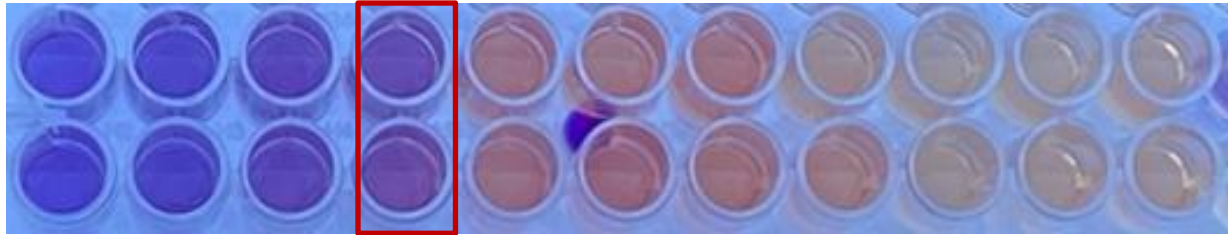

120 60 30 15 7.5 3.75 1.87 0.93 0.46 0.23 0.11

Tobramycin  
**MIC=15(µg/ml)**

S6. Determine the MIC value of antibiotics on SA

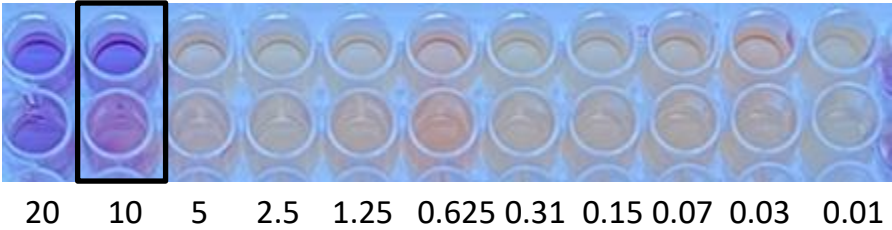

Ampicillin  
**MIC= 10(µg/ml)**

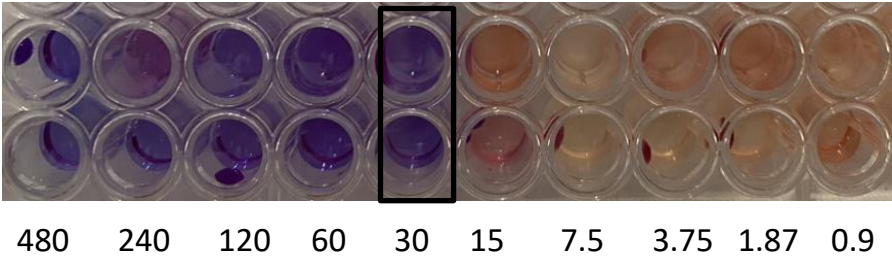

Tetracycline  
**MIC=30 (µg/ml)**

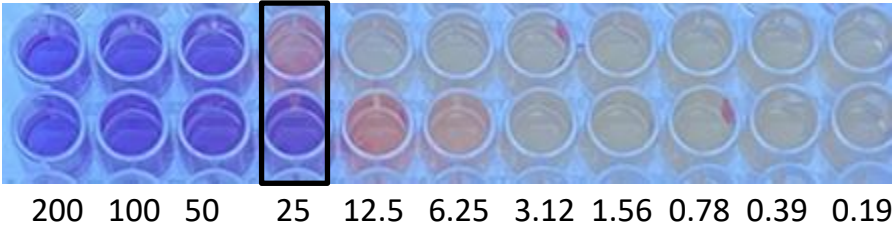

Tobramycin  
**MIC= 25(µg/ml)**
